# Supplementary material for: Development and Validation of a Real-Time PCR Based Assay to Detect Adulteration with Corn in Commercial Turmeric Powder Products
Source: MDPI journal article supplement (doi:10.3390/foods9070882), 2020-07-05
Supplement: s1 [file s1]

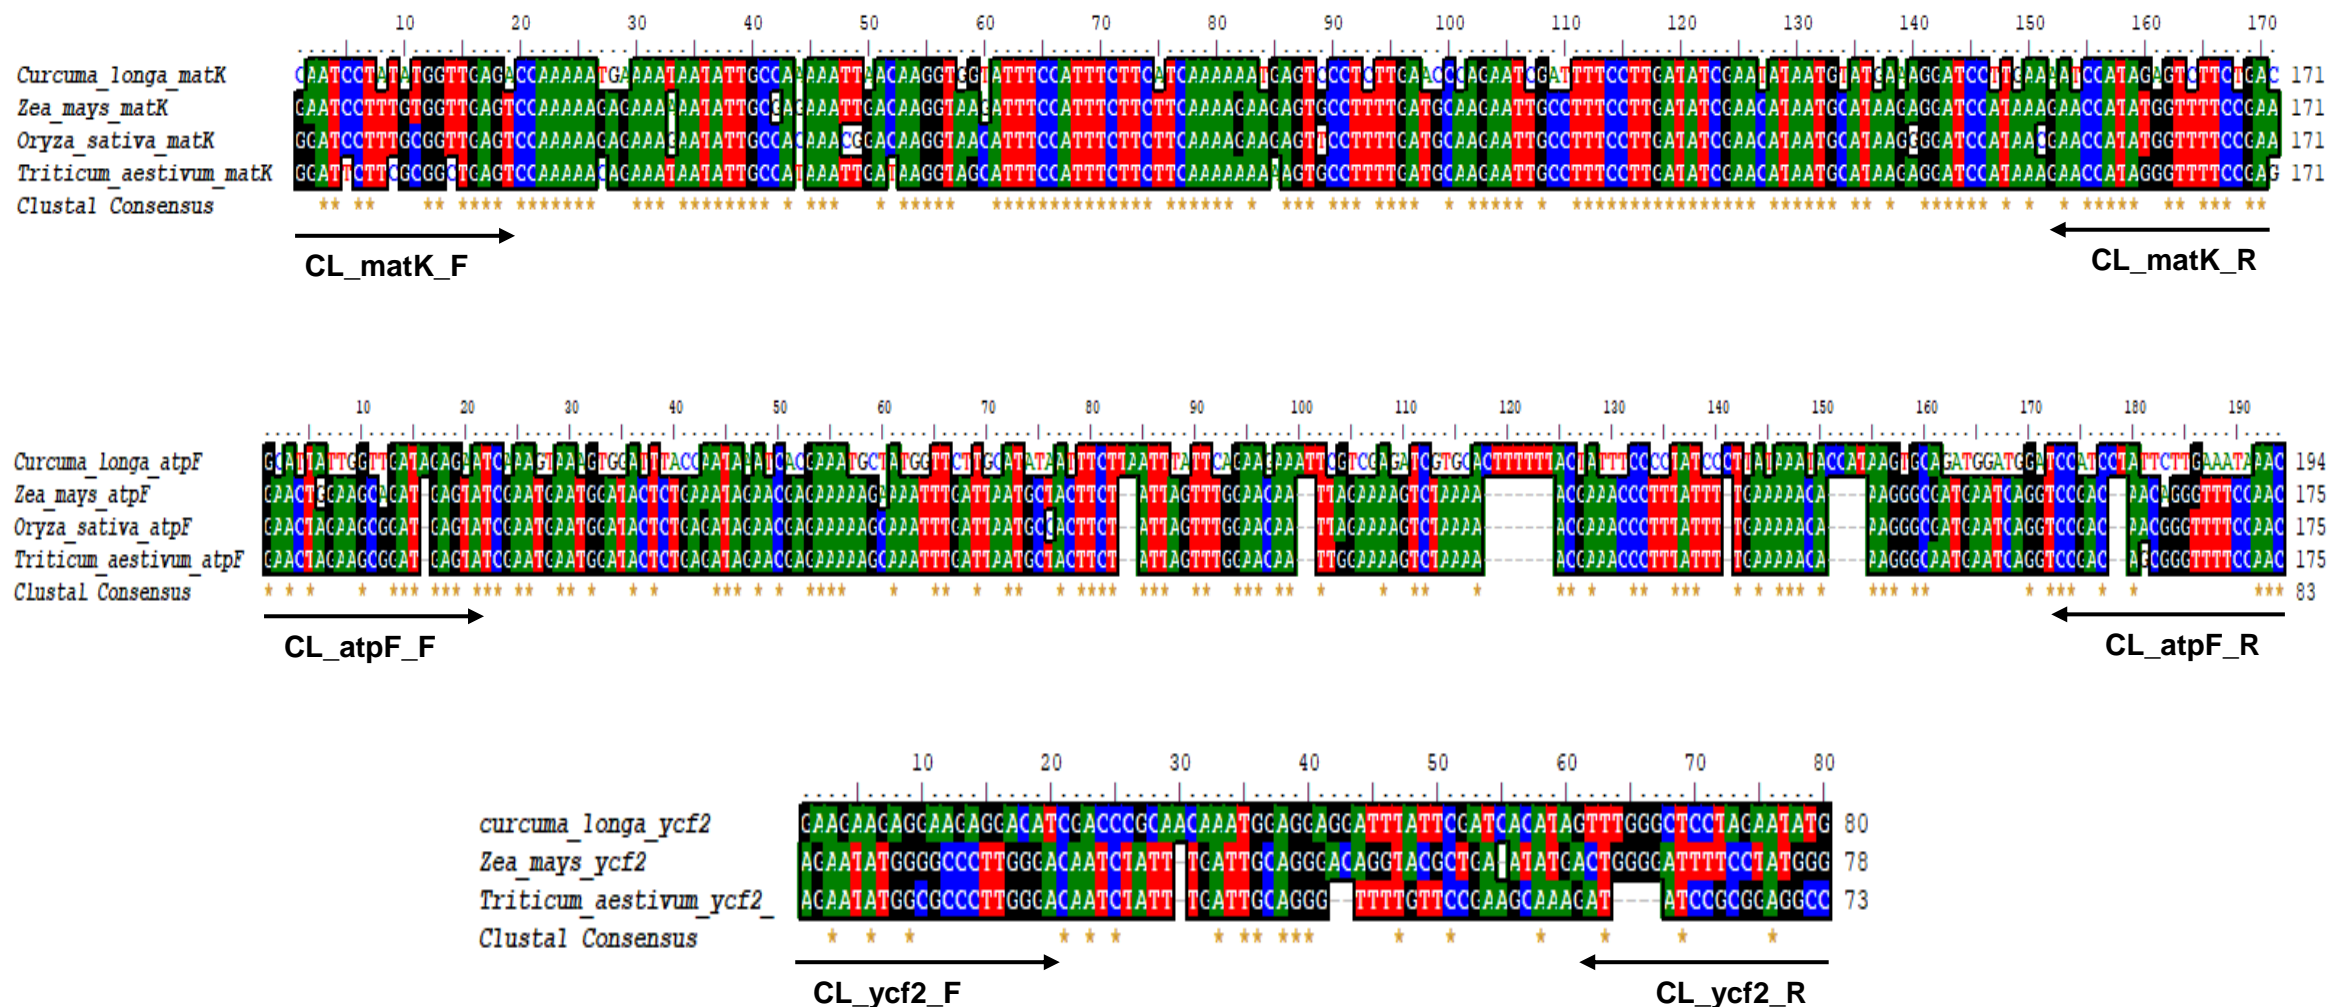

**Supplementary Fig. 1** : Alignment of the target chloroplast gene (*matK*, *atpF* and *ycf2*) nucleotide sequences of *C. longa*, *Z. mays* and starch crops (*O. sativa*, and *T. aestivum*) mainly eating as powders amplified by *C. longa* specific primer sets (CL\_matK, CL\_atpF and CL\_ycf2).

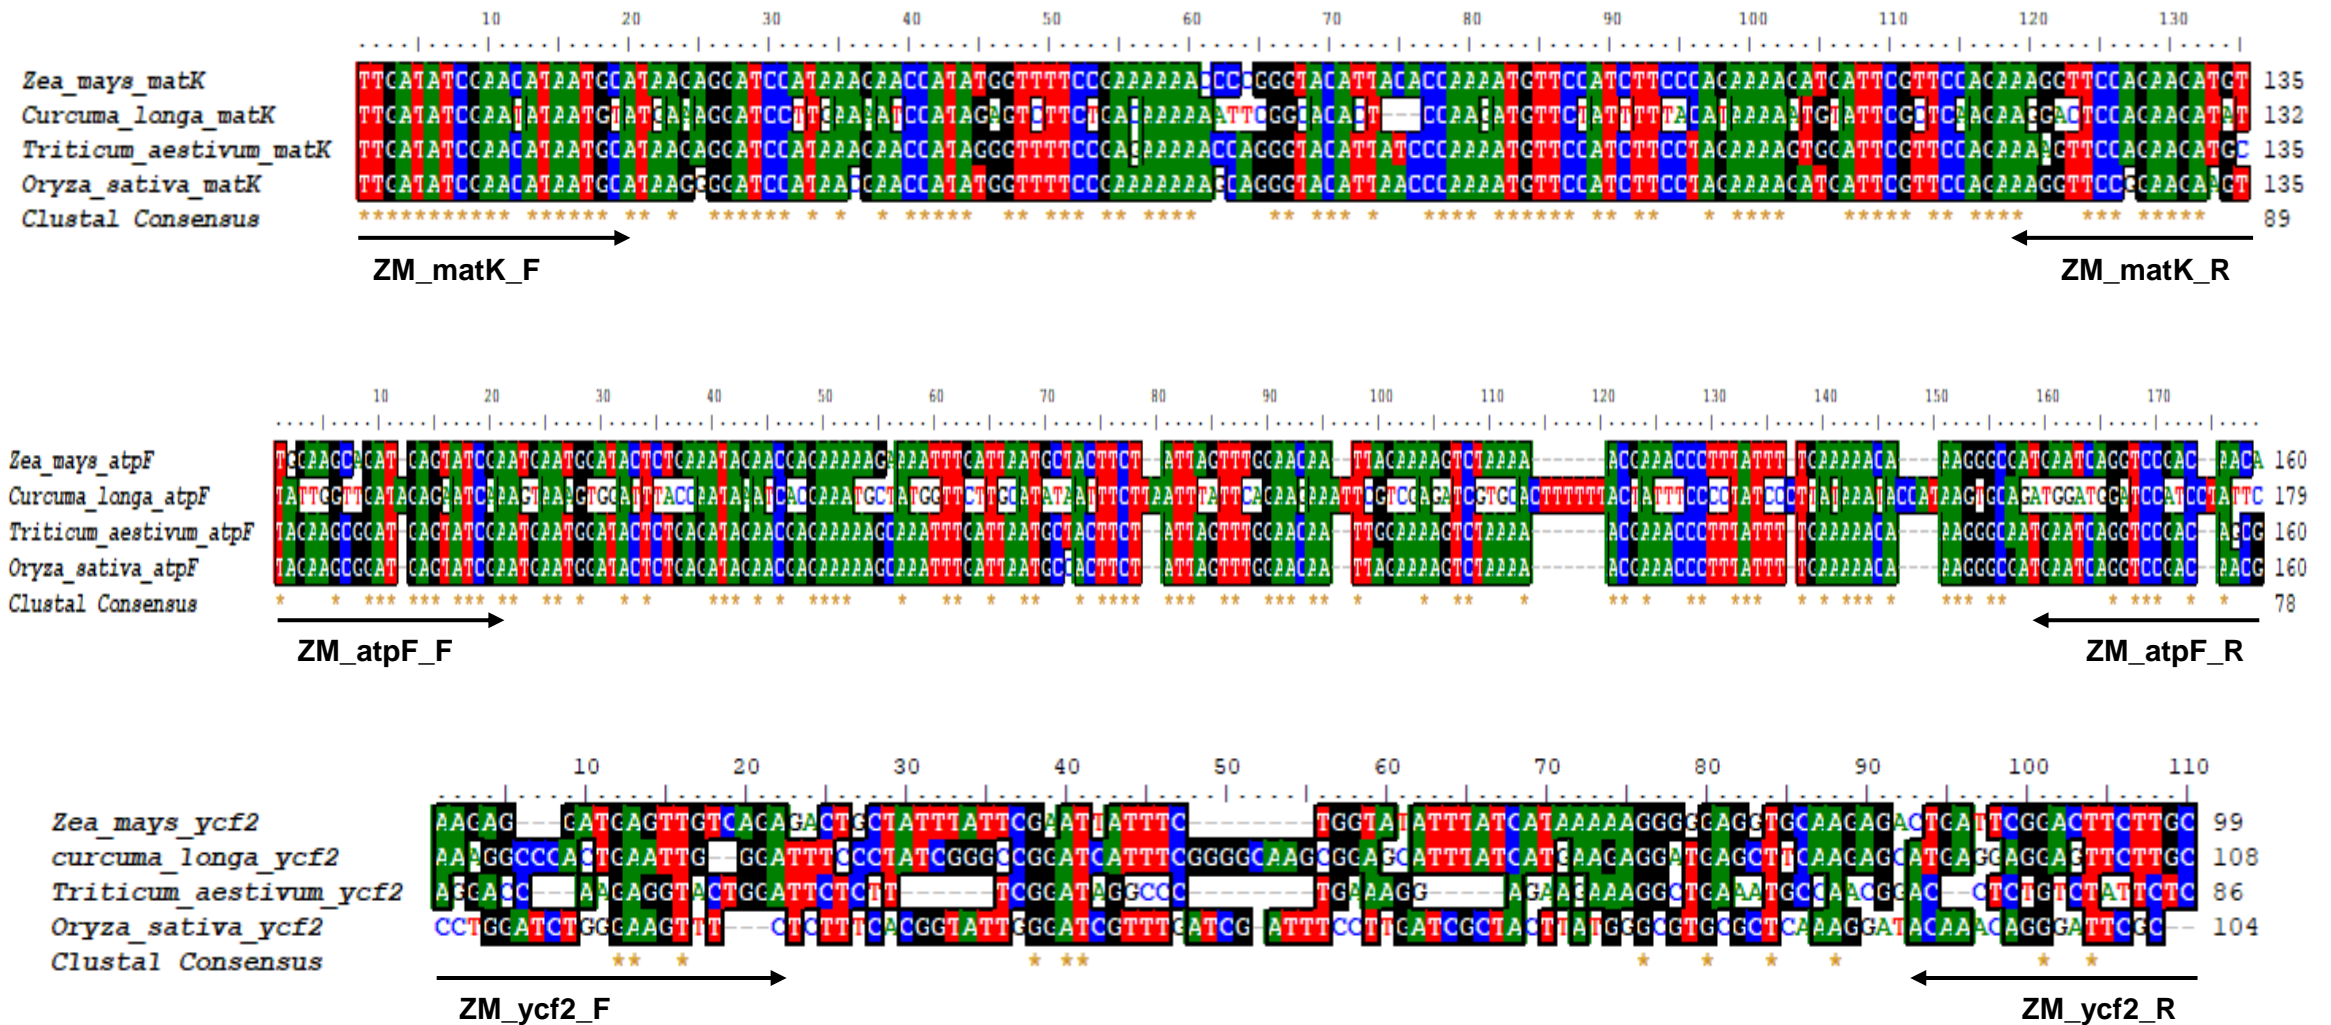

**Supplementary Fig. 2** Alignment of the target chloroplast gene (*matK*, *atpF* and *ycf2*) nucleotide sequences of *Z. mays*, *C. longa* and starch crops (*O. sativa*, and *T. aestivum*) mainly eating as powders, amplified by *Z. mays* specific primer sets (ZM\_matK, ZM\_atpF and ZM\_ycf2).

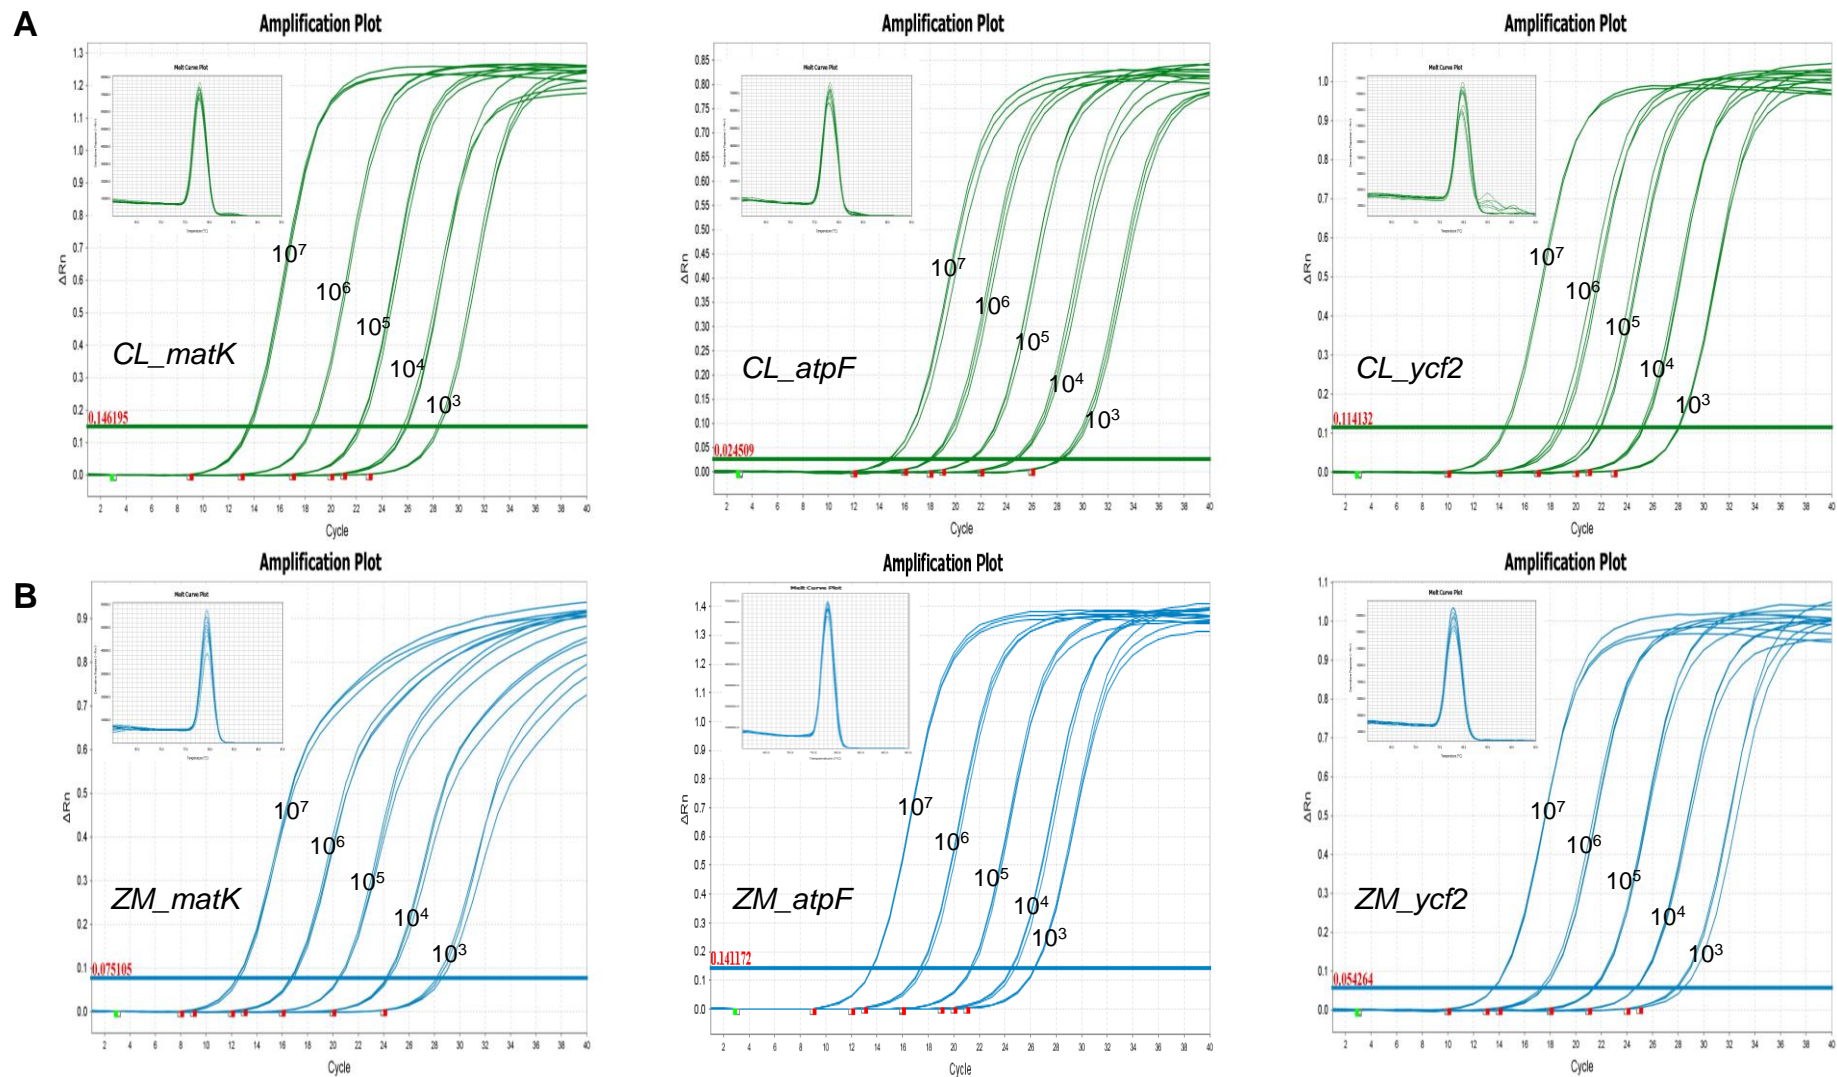

**Supplementary Fig. 3** Real-time PCR with SYBR Green and DNA melting curve analyses. (A) Serial dilution series recombinant plasmids ( $10^7 - 10^3$ ) containing *C. longa* specific gene (*matK*, *atpF* and *ycf2*) sequence were amplified using *C. longa* specific primer sets. (B) Serial dilution series recombinant plasmids ( $10^7 - 10^3$ ) containing *Z. mays* specific gene (*matK*, *atpF* and *ycf2*) sequence were amplified using *Z. mays* specific primer sets. The real-time PCRs were performed on a QuantStudio 3 Real-Time PCR System (Applied Biosystems, Foster City, CA, USA) and carried out in triplicate ( $n=3$ ).

**A**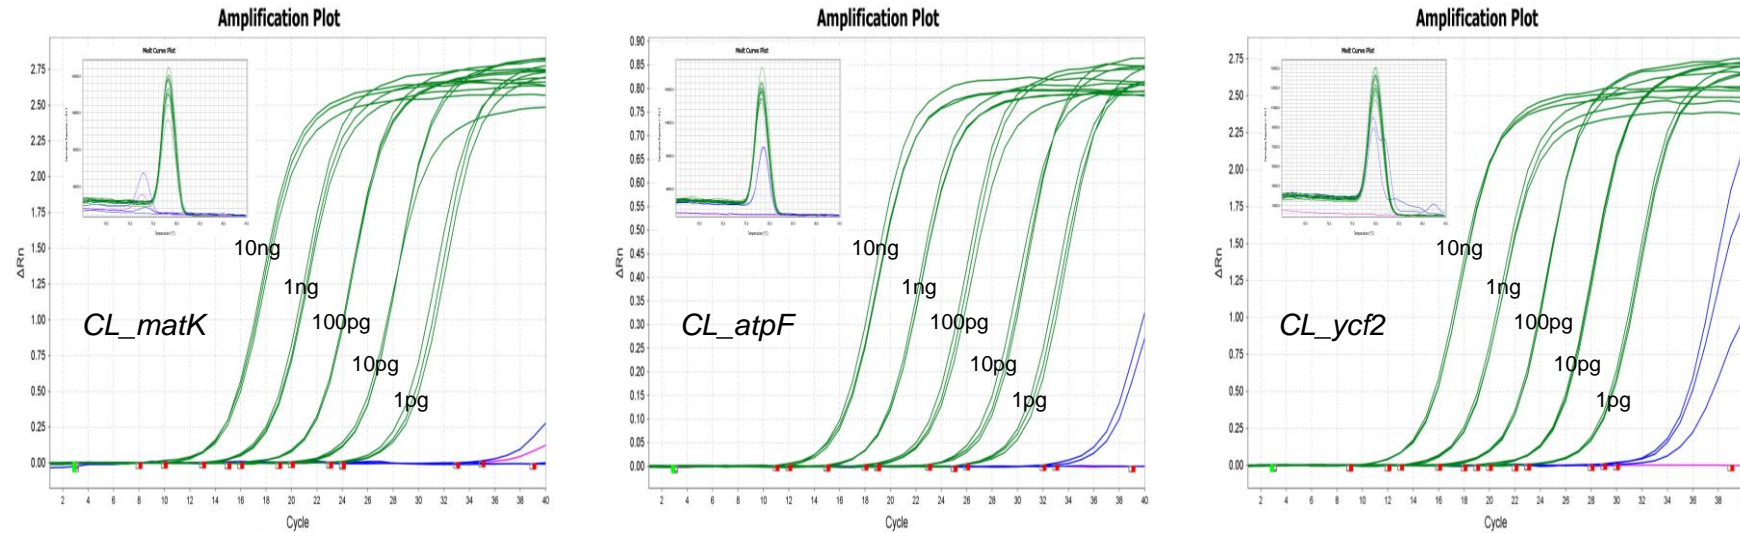**B**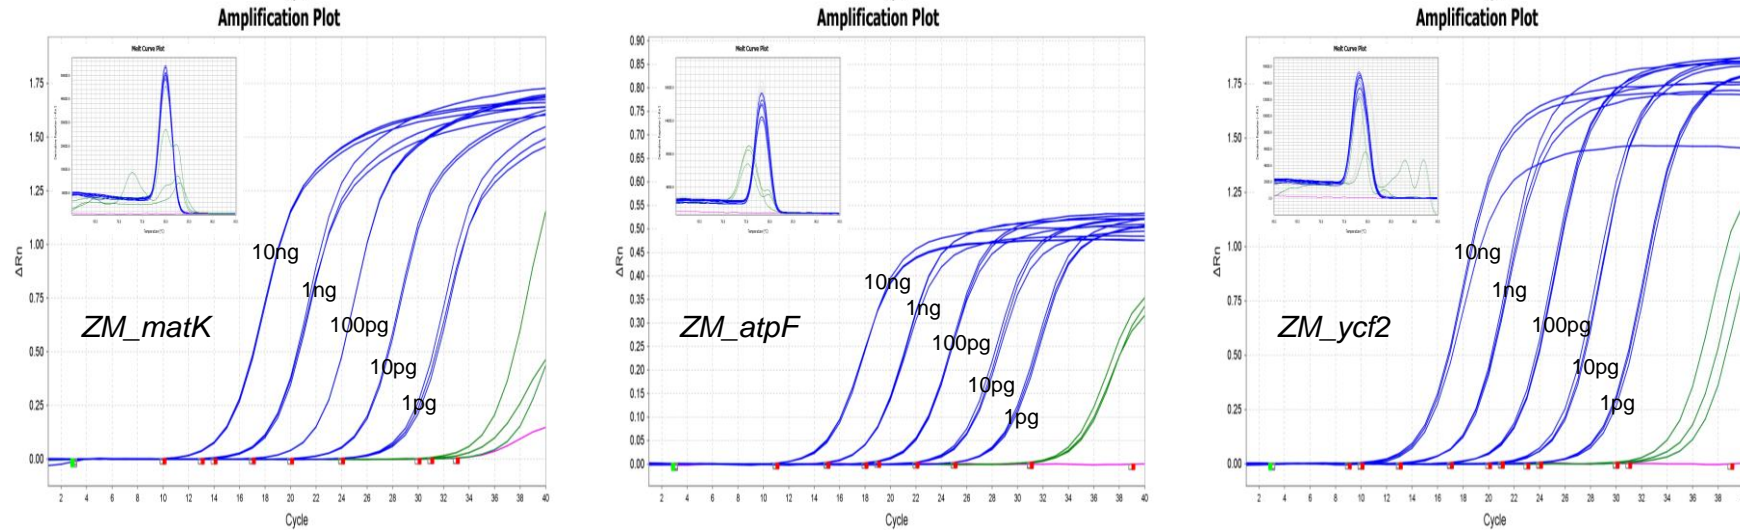

**Supplementary Fig. 4** Real-time PCR with SYBR Green and DNA melting curve analyses; green lanes mean the *C. longa* blue lanes mean *Z. mays* and pink lanes mean NTC. (A) Serial dilution series of *C. longa* genomic DNA (10ng – 1pg) was amplified using *C. longa* specific primer sets. (B) Serial dilution series of *Z. mays* (10ng – 1pg) was amplified using *Z. mays* specific primer sets. The real-time PCRs were performed on a QuantStudio 3 Real-Time PCR System (Applied Biosystems, Foster City, CA, USA) and carried out in triplicate (n=3).
