# Supplementary material for: Development and Validation of a Real-Time PCR Based Assay to Detect Adulteration with Corn in Commercial Turmeric Powder Products
Source: MDPI journal article supplement (doi:10.3390/foods9070882), 2020-07-05
Supplement: s1 [file s1]

**Supplementary table 1.** Evaluation of slope, R<sup>2</sup>, and efficiency using the developed primer sets.

| Target species       | Primer  | Recombinant plasmid |                |                | Genomic DNA |                |                |
|----------------------|---------|---------------------|----------------|----------------|-------------|----------------|----------------|
|                      |         | Y (Slope)           | R <sup>2</sup> | Efficiency (%) | Y (Slope)   | R <sup>2</sup> | Efficiency (%) |
| <i>Curcuma longa</i> | CL_matK | -3.50               | 1.00           | 93.14          | -3.47       | 1.00           | 94.22          |
|                      | CL_atpF | -3.14               | 1.00           | 108.40         | -3.42       | 0.99           | 95.92          |
|                      | CL_ycf2 | -3.35               | 1.00           | 98.94          | -3.47       | 1.00           | 94.09          |
| <i>Zea mays</i>      | ZM_matK | -3.48               | 1.00           | 93.72          | -3.54       | 1.00           | 91.78          |
|                      | ZM_atpF | -3.21               | 1.00           | 104.89         | -3.45       | 1.00           | 94.96          |
|                      | ZM_ycf2 | -3.43               | 1.00           | 95.57          | -3.53       | 1.00           | 92.16          |

**Supplementary table 2.** Result of the real-time PCR assay in an interlaboratory experiment.

| Target species       | Primer  | Laboratory 1 |                |                | Laboratory 2 |                |                |
|----------------------|---------|--------------|----------------|----------------|--------------|----------------|----------------|
|                      |         | Y (Slope)    | R <sup>2</sup> | Efficiency (%) | Y (Slope)    | R <sup>2</sup> | Efficiency (%) |
| <i>Curcuma longa</i> | CL_matK | -3.50        | 1.00           | 93.14          | -3.47        | 1.00           | 94.22          |
|                      | CL_atpF | -3.14        | 1.00           | 108.40         | -3.42        | 0.99           | 95.92          |
|                      | CL_ycf2 | -3.35        | 0.99           | 98.94          | -3.47        | 1.00           | 94.09          |
| <i>Zea mays</i>      | ZM_matK | -3.48        | 1.00           | 93.72          | -3.54        | 1.00           | 91.78          |
|                      | ZM_atpF | -3.41        | 1.00           | 96.32          | -3.45        | 1.00           | 94.96          |
|                      | ZM_ycf2 | -3.43        | 1.00           | 95.57          | -3.53        | 1.00           | 92.16          |

**Supplementary table 3.** Evaluation of the slope, R<sup>2</sup>, and efficiency using binary mixtures containing three different intentionally added powders.

| Target species       | Primer   | Binary mixture with <i>Zea mays</i>      |                |                |             | Binary mixture with <i>Oryza sativa</i> |                |                |             | Binary mixture with <i>Triticum aestivum</i> |                |                |             |
|----------------------|----------|------------------------------------------|----------------|----------------|-------------|-----------------------------------------|----------------|----------------|-------------|----------------------------------------------|----------------|----------------|-------------|
|                      |          | Y (Slope)                                | R <sup>2</sup> | Efficiency (%) | Cut-off Cts | Slope                                   | R <sup>2</sup> | Efficiency (%) | Cut-off Cts | Slope                                        | R <sup>2</sup> | Efficiency (%) | Cut-off Cts |
| <i>Curcuma longa</i> | CL_mattK | -3.55                                    | 0.99           | 91.29          | 28.65       | -3.5                                    | 0.99           | 93.07          | 27.08       | -3.47                                        | 1              | 94.17          | 26.90       |
|                      | CL_atpF  | -3.54                                    | 1              | 91.64          | 28.60       | -3.35                                   | 1              | 98.84          | 26.85       | -3.53                                        | 1              | 91.99          | 26.82       |
|                      | CL_ycf2  | -3.44                                    | 1              | 95.3           | 29.59       | -3.5                                    | 0.99           | 93.07          | 29.19       | -3.38                                        | 1              | 97.63          | 28.87       |
| Target species       | Primer   | Binary mixture with <i>Curcuma longa</i> |                |                |             |                                         |                |                |             |                                              |                |                |             |
|                      |          | Y (Slope)                                | R <sup>2</sup> | Efficiency (%) | Cut-off Cts |                                         |                |                |             |                                              |                |                |             |
| <i>Zea mays</i>      | ZM_mattK | -3.38                                    | 0.99           | 97.63          | 28.41       |                                         |                |                |             |                                              |                |                |             |
|                      | ZM_atpF  | -3.12                                    | 1              | 109.18         | 29.68       |                                         |                |                |             |                                              |                |                |             |
|                      | ZM_ycf2  | -3.44                                    | 1              | 95.3           | 27.58       |                                         |                |                |             |                                              |                |                |             |

**Supplementary table 4.** Information on the commercial food products.

| Species              | Sample | Sample type     | Ingredients                                                    |
|----------------------|--------|-----------------|----------------------------------------------------------------|
| <i>Curcuma longa</i> | 1      | Turmeric powder | <i>Curcuma longa</i> 100%                                      |
|                      | 2      | Turmeric powder | <i>Curcuma longa</i> 100%                                      |
|                      | 3      | Turmeric powder | <i>Curcuma longa</i> 100%                                      |
|                      | 4      | Turmeric powder | <i>Curcuma longa</i> 100%                                      |
|                      | 5      | Turmeric powder | <i>Curcuma longa</i> 100%                                      |
|                      | 6      | Pill            | <i>Curcuma longa</i> 49% Dried orange peel 41% Sticky rice 10% |
|                      | 7      | Turmeric powder | <i>Curcuma longa</i> 100%                                      |
|                      | 8      | Turmeric powder | <i>Curcuma longa</i> 100%                                      |
|                      | 9      | Turmeric powder | <i>Curcuma longa</i> 100%                                      |
|                      | 10     | Turmeric powder | <i>Curcuma longa</i> 100%                                      |
